# Supplementary material for: Photo-adaptable shape memory hydrogels based on orthogonal supramolecular interactions
Source: Royal Society of Chemistry journal article supplement (doi:10.1039/c9py00851a), 2019-01-01
Supplement: c9py00851a2.pdf [file c9py00851a2.pdf]

## **Supporting Information**

### **Photo-adaptable shape memory hydrogel based on orthogonal supramolecular interactions**

*Manqing Xie, Chen Wu, Chongyi Chen, Ying liu, Chuanzhuang Zhao\**

*Ningbo Key Laboratory of Specialty Polymers, School of Material Science and*

*Chemical Engineering, Ningbo University, Ningbo, Zhejiang 315211, China*

**Table S1.** Characterization of host-guest cross-linked hydrogel.

|    | [Acrylamide]<br>(mol/L) | Alginate<br>(g/mL) | [Azobenzene]<br>(mmol/L) | [ $\alpha$ -cyclodextrin]<br>(mmol/L) | [Cross-linker]/<br>[Monomer] | $M_c^b$<br>(kg/mol) |
|----|-------------------------|--------------------|--------------------------|---------------------------------------|------------------------------|---------------------|
| 1# | 3.9                     | 0.013              | 7.1                      | 7.1                                   | 0.18 %                       | ~20                 |
| 2# | 3.9                     | 0.013              | 3.6                      | 3.6                                   | 0.09 %                       | ~39                 |
| 3# | 3.9                     | 0.013              | 19.8                     | 19.8                                  | 0.50 %                       | ~7.1                |
| 4# | 3.9                     | 0.0064             | 7.1                      | 7.1                                   | 0.18 %                       | ~20                 |
| 5# | 3.9                     | 0.017              | 7.1                      | 7.1                                   | 0.18 %                       | ~20                 |

<sup>a</sup> Measured with UV-VIS absorbance spectra.

<sup>b</sup> Number-averaged molecular weight between cross-linking points, calculated by  $M_c = M_{\text{monomer}} * [\text{Monomer}] / [\text{Crosslinker}] / 2$ .

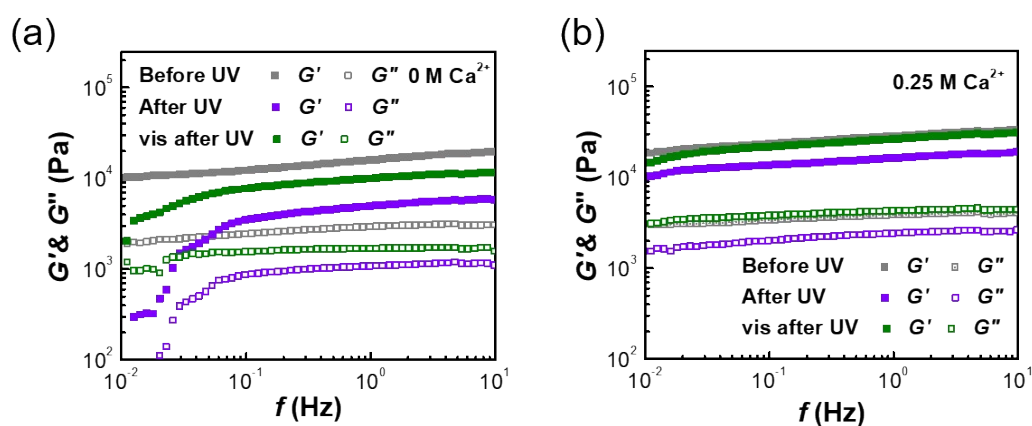

**Figure S1.** Rheological properties of host-guest cross-linked PAAm/alginate hydrogel in different cross-linking states: (a) in the absence  $\text{Ca}^{2+}$  and (b) in the presence of 0.25 M  $\text{Ca}^{2+}$ . All the data were measured at a shearing strain amplitude of 1.0 % and at 25 °C.

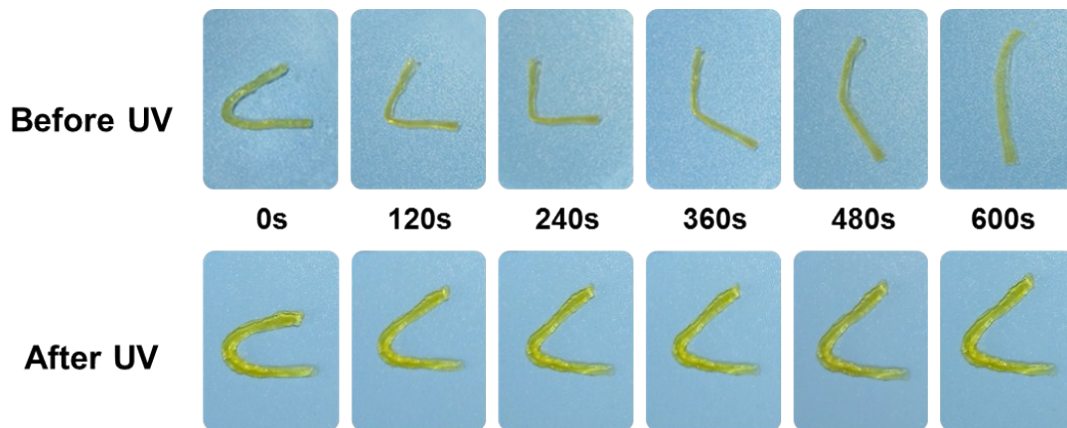

**Figure S2.** Shape recovery in 0.25 M EDTA solution before and after UV irradiation, where temporary shape was fixed with 0.25 M  $\text{Ca}^{2+}$ .

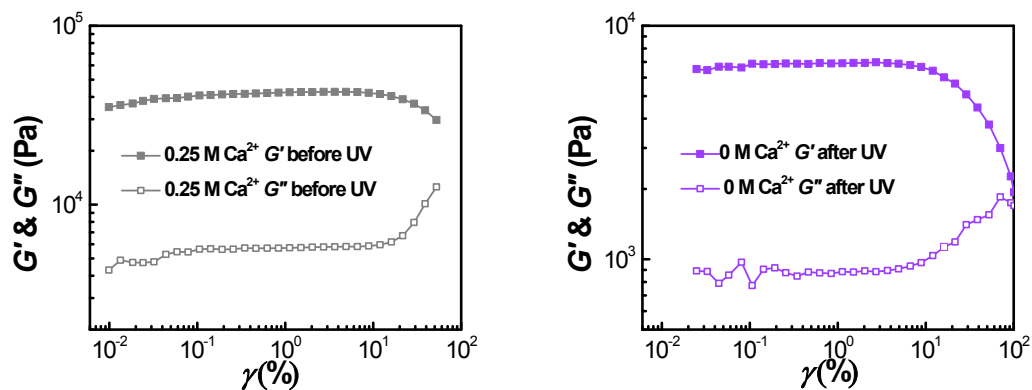

**Figure S3** Storage and loss shearing moduli as functions of shear strain amplitude of the host-guest cross-linked hydrogel, measured with a frequency of 1 Hz. The linear viscoelastic region is within  $\gamma \leq 10.0\%$ .

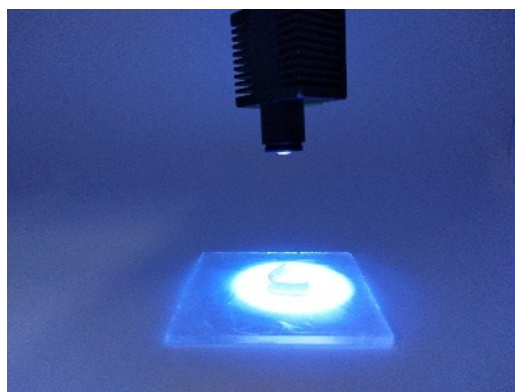

**Figure S4.** A graph of the apparatus for the light-treatment.
